# Supplementary material for: Targeted near infrared hyperthermia combined with immune stimulation for optimized therapeutic efficacy in thyroid cancer treatment
Source: PubMed Central journal article supplement (PMC4872755; doi:10.18632/oncotarget.6901), 2016-01-12
Supplement: oncotarget-07-6878-s001.pdf [file oncotarget-07-6878-s001.pdf]

## Targeted near infrared hyperthermia combined with immune stimulation for optimized therapeutic efficacy in thyroid cancer treatment

### Supplementary Materials

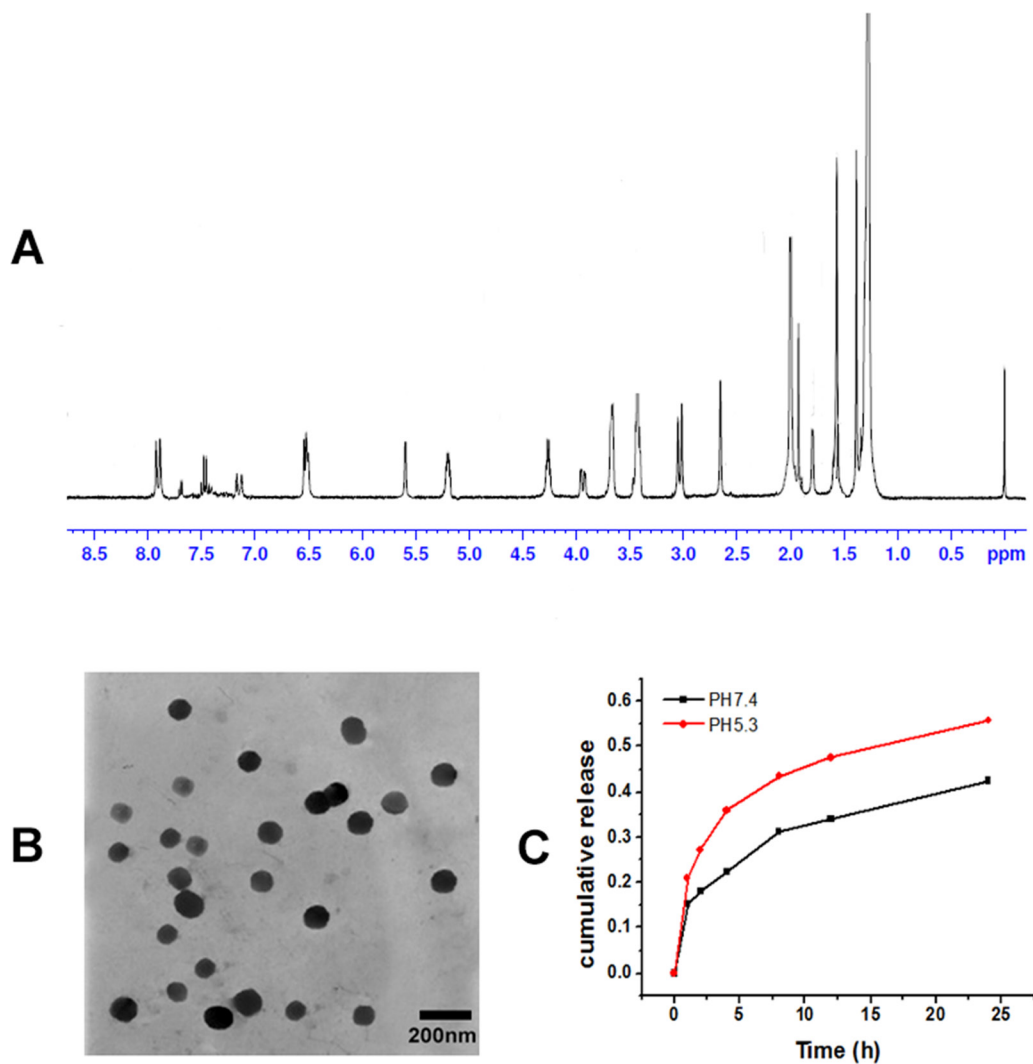

**Supplementary Figure S1:** (A) NMR spectrum of the probe AG-IR820; (B) TEM picture of the Quercetin-loaded liposomes; (C) Release rate of the Quercetin-loaded liposomes.

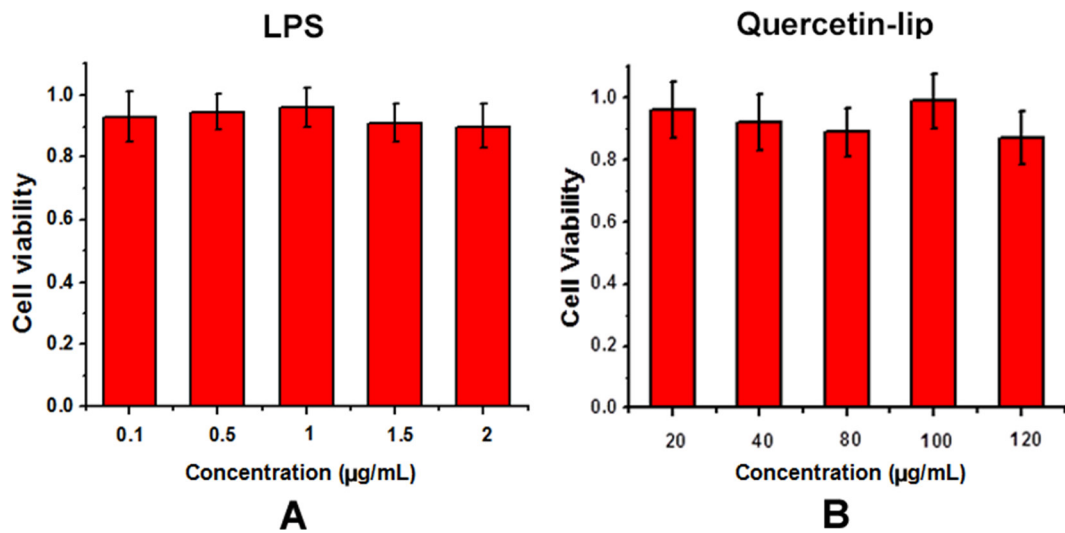

**Supplementary Figure S2:** (A) cytotoxicity of LPS on human normal liver cells L02. (B) cytotoxicity of Quercetin-lip on human normal liver cells L02.

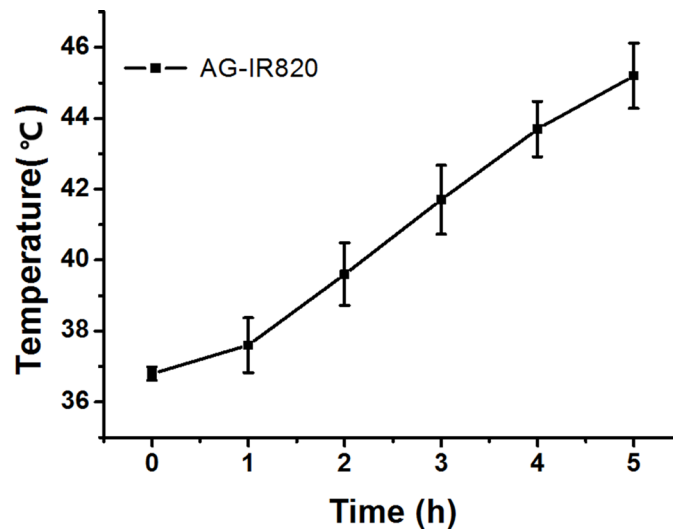

**Supplementary Figure S3:** Temperature elevation of AG-IR820 in the tumor tissue.

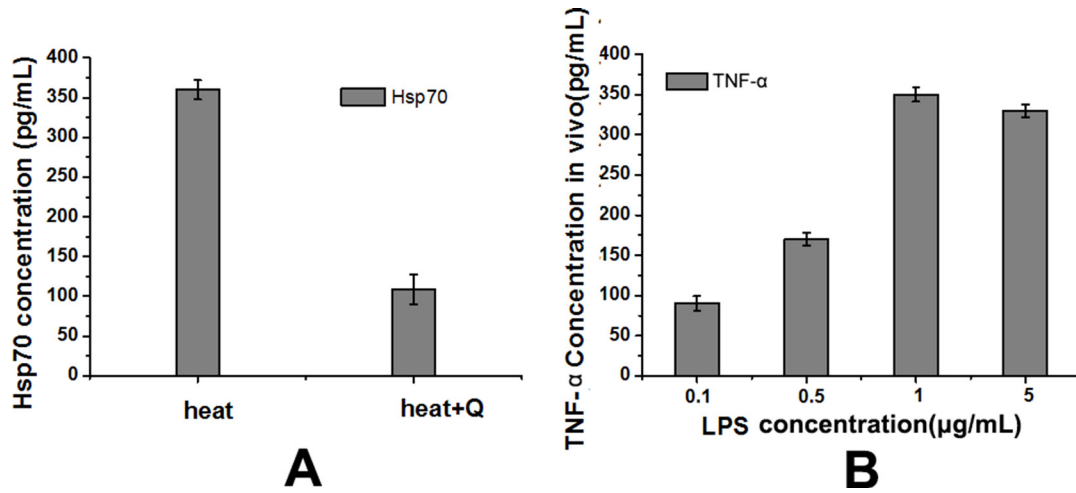

**Supplementary Figure S4:** (A) Hsp70 expression in tumor tissue comparison between with or without Quercetin-lip injected by Elisa method. (B) TNF- $\alpha$  expression in tumor tissue comparison between with or without LPS injected by Elisa method.
